# Supplementary material for: The promoting effect of pyridine ligands in the Pd-catalysed Heck–Matsuda reaction
Source: Royal Society of Chemistry journal article supplement (doi:10.1039/c6nj01717g), 2016-01-01
Supplement: c6nj01717g1.pdf [file c6nj01717g1.pdf]

## Supplementary Information for:

### The promoting effect of pyridine ligands in the Pd-catalysed Heck-Matsuda reaction

Walid Khodja,<sup>[a],[b]</sup> Alexandre Leclair,<sup>[a]</sup> Jordi Rull-Barrull,<sup>[a]</sup> Françoise Zammattio,<sup>[a]</sup> Ksenia V. Kutonova,<sup>[c]</sup> Marina E. Trusova,<sup>[c]</sup> François-Xavier Felpin\*<sup>[a],[d]</sup> and Mireia Rodriguez-Zubiri\*<sup>[a]</sup>

**Abstract:** An efficient Pd-catalyzed arylation reaction of challenging acyclic olefins, in the presence of an organic ligand, has been disclosed. Commercially available cheap pyridine-based ligands are able to promote good to excellent yields for poorly efficient Heck-Matsuda arylation reactions of several allylic alcohols. A wide range of electronically different arenediazonium salts bearing either electron-releasing or withdrawing groups have been used allowing the synthesis of a range of  $\beta$ -aryl-methoxy-lactols. The catalytic system has been optimised, along with the reaction conditions, in order to achieve remarkable yields in less than 1 h.

```

=====
Acq. Operator   : SYSTEM                      Seq. Line :    8
Acq. Instrument : GC 7820 N2                 Location  : Vial 108
Injection Date  : 6/2/2015 9:00:48 PM       Inj       :    1
                                           Inj Volume: 0.5 µl

Acq. Method     : C:\CHEM32\1\DATA\JUIN_2015\MRZ-02-06-2015 2015-06-02 15-55-28\CETONE-N2-MRZ
-3.M
Last changed    : 6/2/2015 3:55:28 PM by SYSTEM
Analysis Method : C:\CHEM32\1\DATA\JUIN_2015\MRZ-02-06-2015 2015-06-02 15-55-28\CETONE-N2-MRZ
-3.M (Sequence Method)
Last changed    : 7/21/2016 3:55:34 PM by SYSTEM
                 (modified after loading)
Additional Info  : Peak(s) manually integrated
  
```

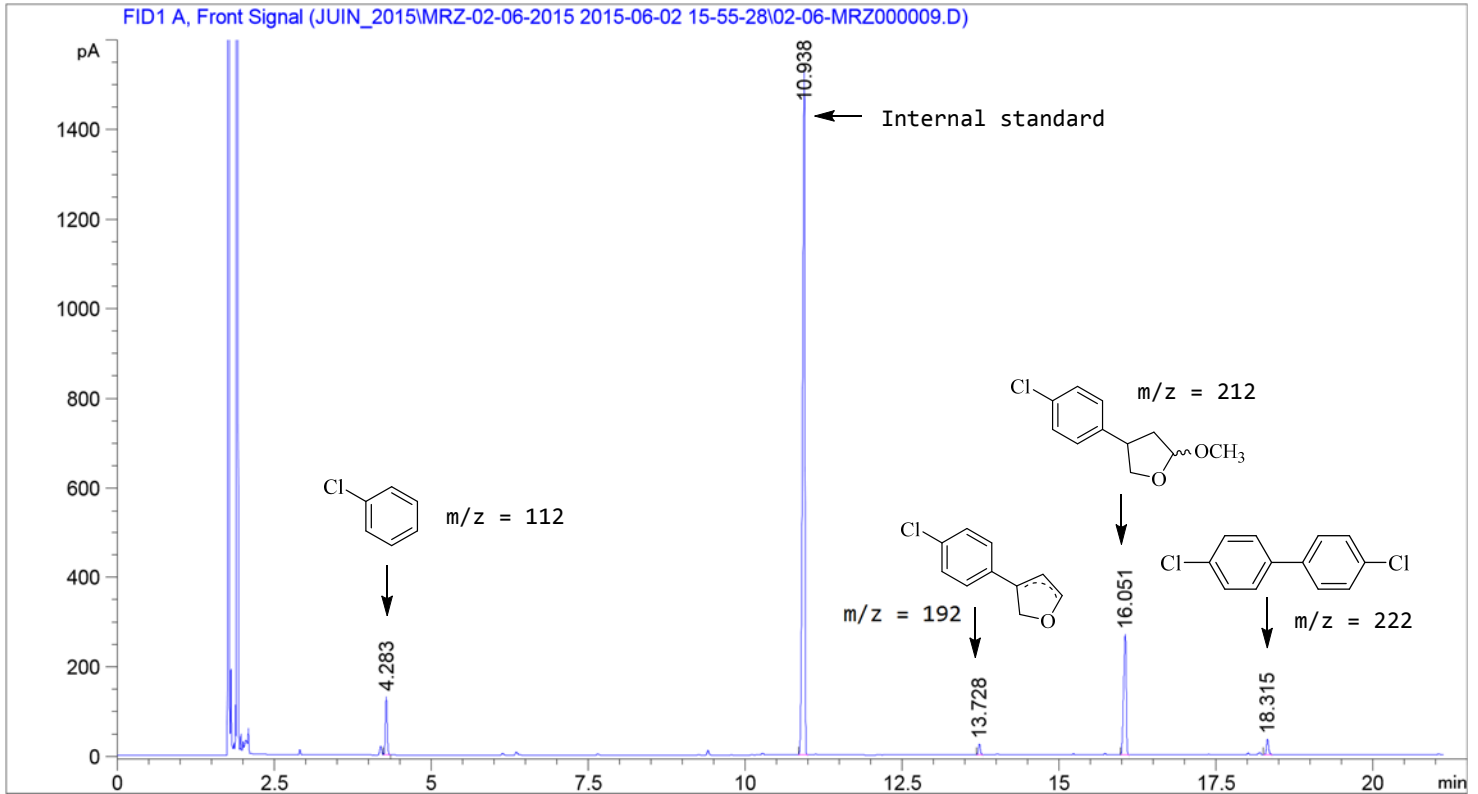

Area Percent Report

Signal 1: FID1 A, Front Signal

| Peak # | RetTime [min] | Type | Width [min] | Area [pA*s] | Height [pA] | Area %   |
|--------|---------------|------|-------------|-------------|-------------|----------|
| 1      | 4.283         | VB   | 0.0316      | 263.82303   | 130.64838   | 5.24343  |
| 2      | 10.938        | BB   | 0.0403      | 3846.60205  | 1530.82581  | 76.45046 |
| 3      | 13.728        | BB   | 0.0339      | 51.45147    | 24.14766    | 1.02259  |
| 4      | 16.051        | BB   | 0.0420      | 784.76245   | 269.03461   | 15.59700 |
| 5      | 18.315        | VB   | 0.0374      | 84.85745    | 34.82517    | 1.68653  |

Totals : 5031.49645

\*\*\* End of Report \*\*\*

```

=====
Acq. Operator   : SYSTEM                      Seq. Line :    4
Acq. Instrument : GC 7820 N2                 Location  : Vial 104
Injection Date  : 7/21/2015 3:13:28 PM      Inj       :    1
                                           Inj Volume: 0.5 µl

Acq. Method     : C:\CHEM32\1\DATA\JUILLET_2015\MRZ-21-07-2015 2015-07-21 12-34-51\CETONE-N2
MRZ-3.M
Last changed    : 7/21/2015 12:34:51 PM by SYSTEM
Analysis Method : C:\CHEM32\1\DATA\JUILLET_2015\MRZ-21-07-2015 2015-07-21 12-34-51\CETONE-N2-
MRZ-3.M (Sequence Method)
Last changed    : 7/21/2016 4:06:29 PM by SYSTEM
                 (modified after loading)
Additional Info  : Peak(s) manually integrated
  
```

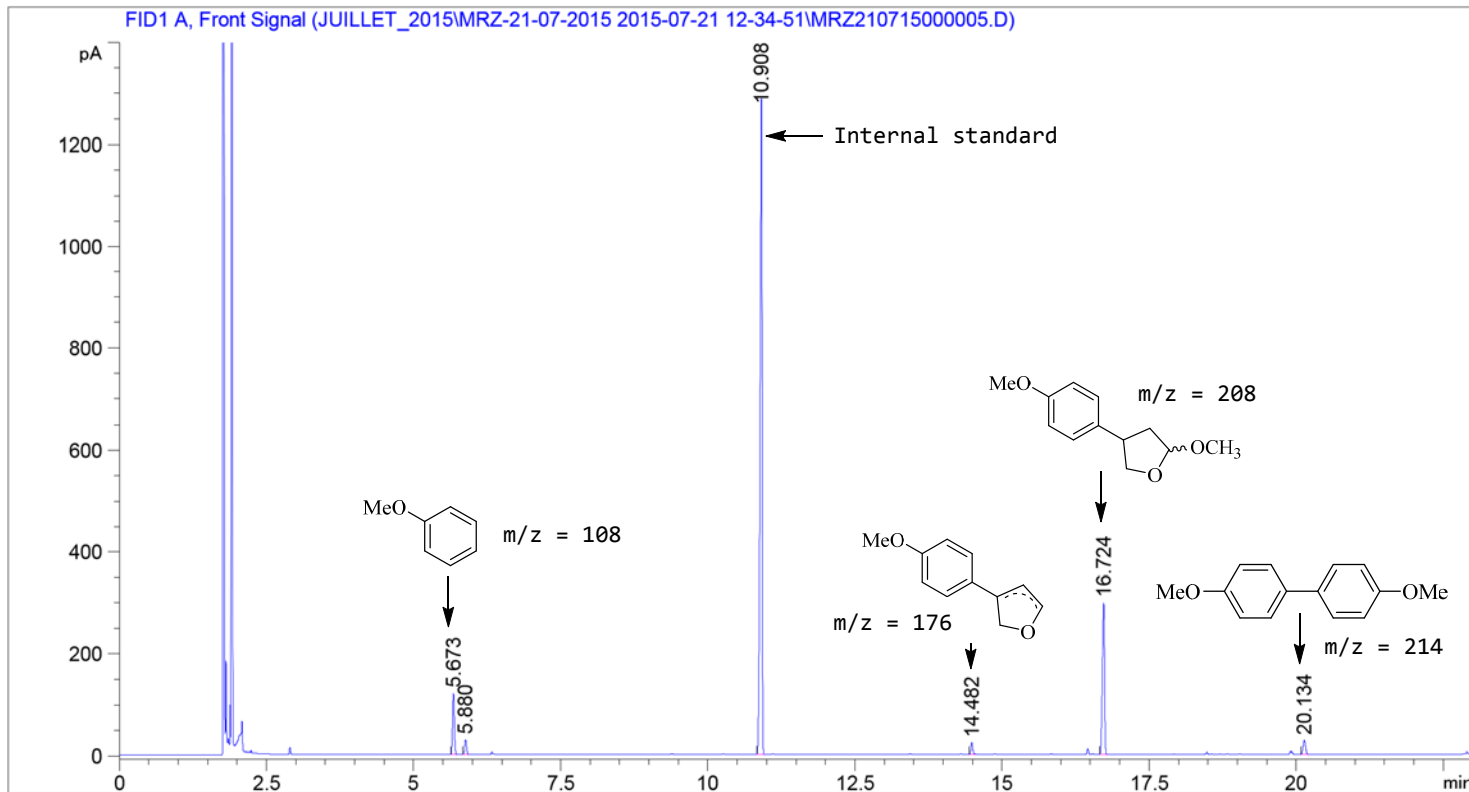

Area Percent Report

Signal 1: FID1 A, Front Signal

| Peak # | RetTime [min] | Type | Width [min] | Area [pA*s] | Height [pA] | Area %   |
|--------|---------------|------|-------------|-------------|-------------|----------|
| 1      | 5.673         | BB   | 0.0325      | 251.52357   | 119.58798   | 5.84342  |
| 2      | 5.880         | BB   | 0.0332      | 61.10085    | 28.33305    | 1.41950  |
| 3      | 10.908        | BB   | 0.0364      | 3010.58398  | 1282.58557  | 69.94213 |
| 4      | 14.482        | BB   | 0.0337      | 44.42036    | 20.94839    | 1.03198  |
| 5      | 16.724        | BB   | 0.0411      | 764.76294   | 295.98099   | 17.76703 |
| 6      | 20.134        | BB   | 0.0457      | 78.48297    | 27.19367    | 1.82332  |

Totals : 4210.8744

\*\*\* End of Report \*\*\*

Sample Name: AL20-1

```

=====
Acq. Operator   : SYSTEM                      Seq. Line :    1
Acq. Instrument : GC 7820 N2                 Location  : Vial 101
Injection Date  : 6/23/2015 1:00:31 PM      Inj       :    2
                                           Inj Volume: 0.5 µl
Acq. Method     : C:\CHEM32\1\DATA\JUIN_2015\MRZ23-06-2015. 2015-06-23 12-14-22\CETONE-N2-MRZ-3.M
Last changed    : 6/23/2015 12:14:22 PM by SYSTEM
Analysis Method : C:\CHEM32\1\DATA\JUIN_2015\MRZ23-06-2015. 2015-06-23 12-14-22\DIOL-N02-N2-MRZ-CAL.M (Sequence Method)
Last changed    : 7/21/2016 4:09:04 PM by SYSTEM
                 (modified after loading)
Additional Info  : Peak(s) manually integrated
=====

```

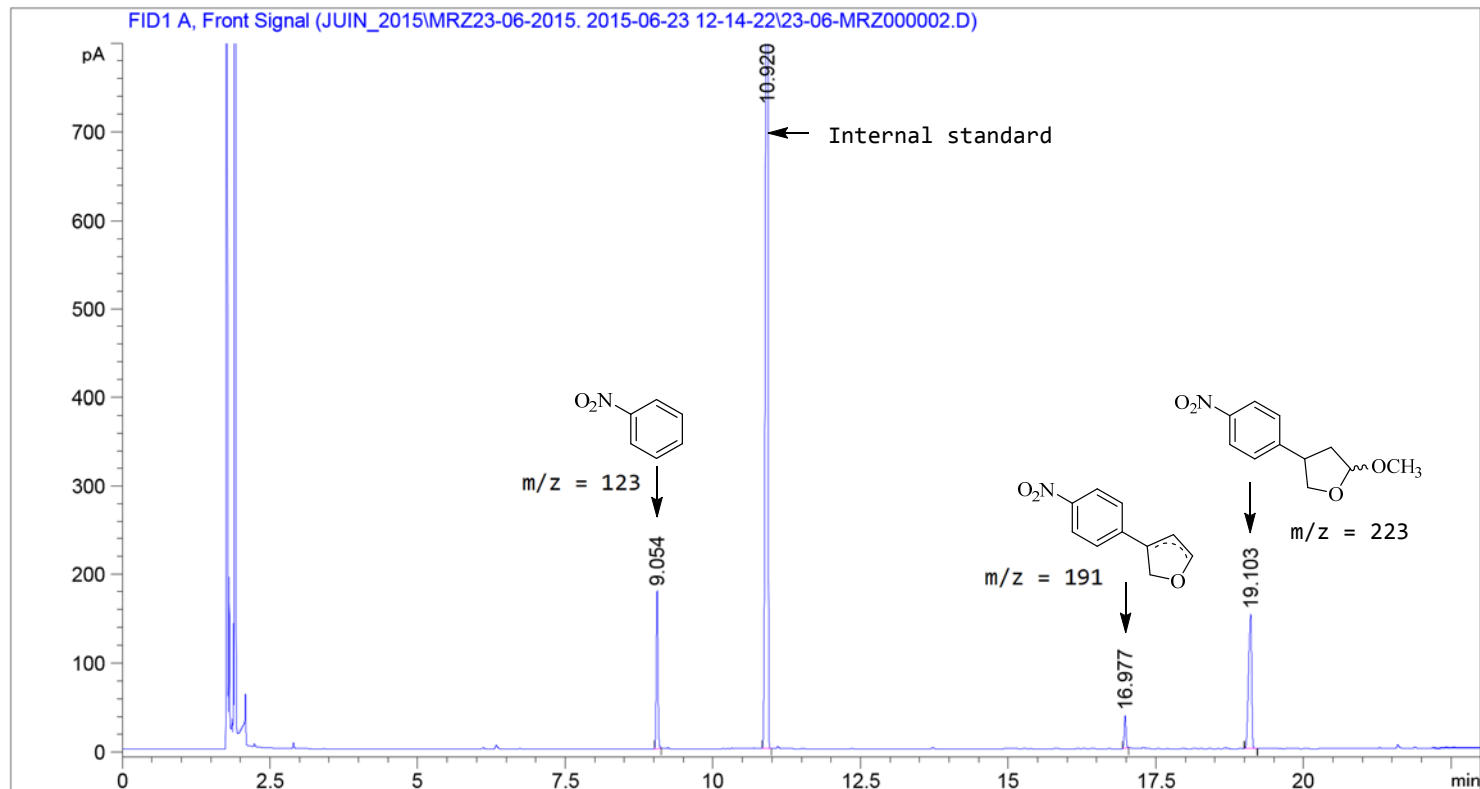

```

=====
                          Area Percent Report
=====

```

Signal 1: FID1 A, Front Signal

| Peak # | RetTime [min] | Type | Width [min] | Area [pA*s] | Area %   | Name    |
|--------|---------------|------|-------------|-------------|----------|---------|
| 1      | 9.054         | BB   | 0.0312      | 349.31161   | 6.77902  | ?       |
| 2      | 10.920        | BB I | 0.0386      | 4083.31665  | 79.24408 | ref int |
| 3      | 16.977        | BB   | 0.0323      | 75.87704    | 1.47253  | ?       |
| 4      | 19.103        | BB   | 0.0613      | 559.45679   | 10.85726 | product |

```
Totals :                      5067.9619
=====
```

```

=====
Acq. Operator   : SYSTEM                      Seq. Line :    1
Acq. Instrument : GC 7820 N2                 Location  : Vial 101
Injection Date  : 10/20/2015 6:42:46 PM      Inj       :    2
                                           Inj Volume: 0.5 µl

Acq. Method     : C:\CHEM32\1\DATA\OCTOBRE-2015\MRZ-20-10-2015 JORDI 2015-10-20 18-03-07
                  \CETONE-N2-MRZ-3.M

Last changed    : 10/20/2015 6:03:07 PM by SYSTEM

Analysis Method : C:\CHEM32\1\DATA\OCTOBRE-2015\MRZ-20-10-2015 JORDI 2015-10-20 18-03-07
                  \CETONE-N2-MRZ-3.M (Sequence Method)

Last changed    : 7/21/2016 4:13:36 PM by SYSTEM
                  (modified after loading)

Additional Info  : Peak(s) manually integrated
  
```

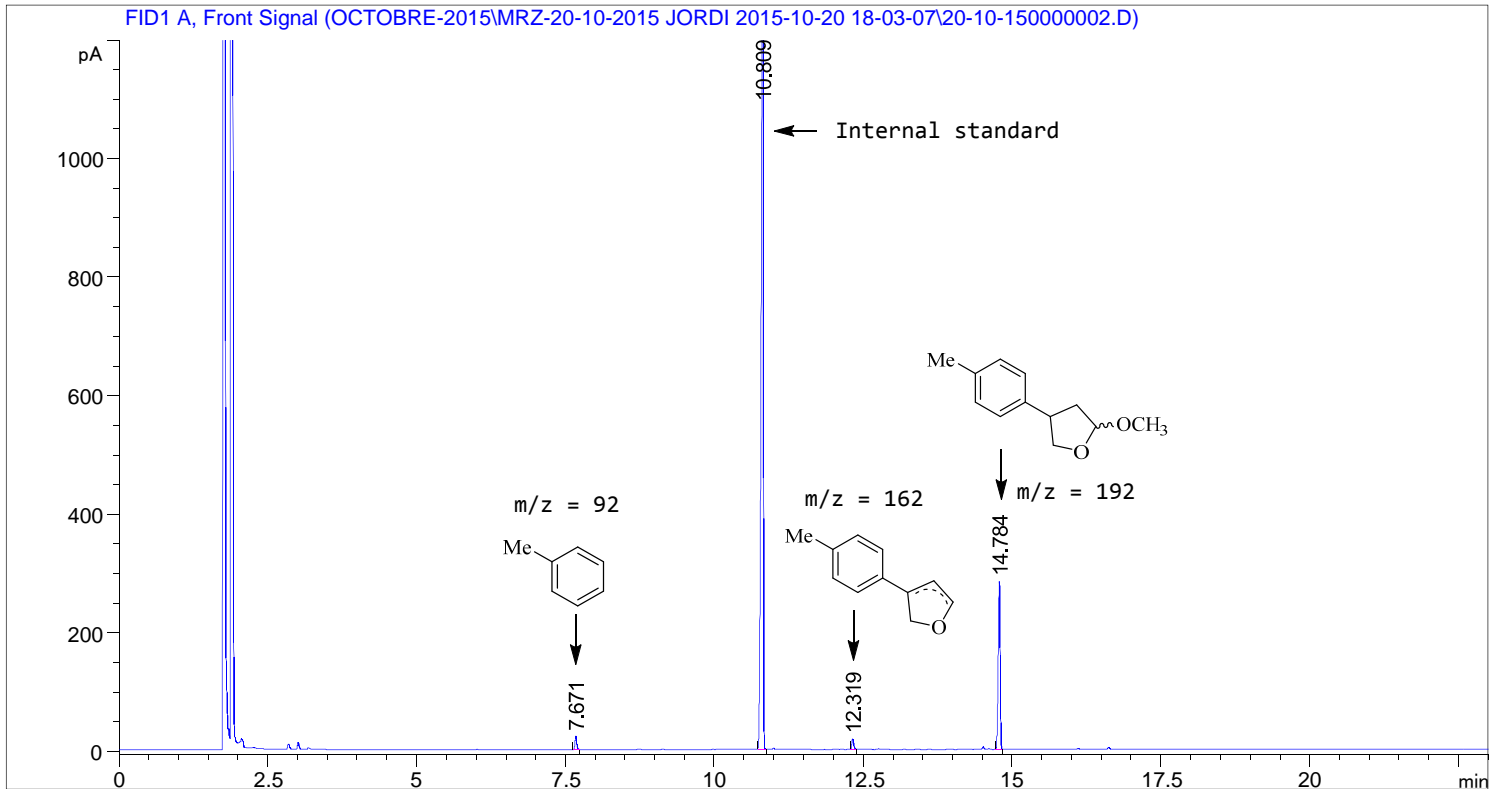

=====  
 Area Percent Report  
 =====

Signal 1: FID1 A, Front Signal

| Peak # | RetTime [min] | Type | Width [min] | Area [pA*s] | Height [pA] | Area %   |
|--------|---------------|------|-------------|-------------|-------------|----------|
| 1      | 7.671         | BB   | 0.0328      | 47.44844    | 22.33588    | 1.08857  |
| 2      | 10.809        | BB   | 0.0380      | 3582.16724  | 1439.12085  | 82.18280 |
| 3      | 12.319        | BB   | 0.0332      | 38.83825    | 17.97711    | 0.89103  |
| 4      | 14.784        | BB   | 0.0361      | 635.14612   | 283.89560   | 14.57165 |

Totals : 4303.5999

=====  
 \*\*\* End of Report \*\*\*

```

=====
Acq. Operator   : SYSTEM                      Seq. Line :    7
Acq. Instrument : GC 7820 N2                 Location  : Vial 107
Injection Date  : 6/24/2015 8:18:11 PM      Inj       :    1
                                           Inj Volume: 0.5 µl

Acq. Method     : C:\CHEM32\1\DATA\JUIN_2015\MRZ-24-06-15-2 2015-06-24 15-51-03\CETONE-N2-MRZ
-3.M
Last changed    : 6/24/2015 3:51:03 PM by SYSTEM
Analysis Method : C:\CHEM32\1\DATA\JUIN_2015\MRZ-24-06-15-2 2015-06-24 15-51-03\CETONE-N2-MRZ
-3.M (Sequence Method)
Last changed    : 7/21/2016 4:15:53 PM by SYSTEM
                 (modified after loading)
Additional Info  : Peak(s) manually integrated
  
```

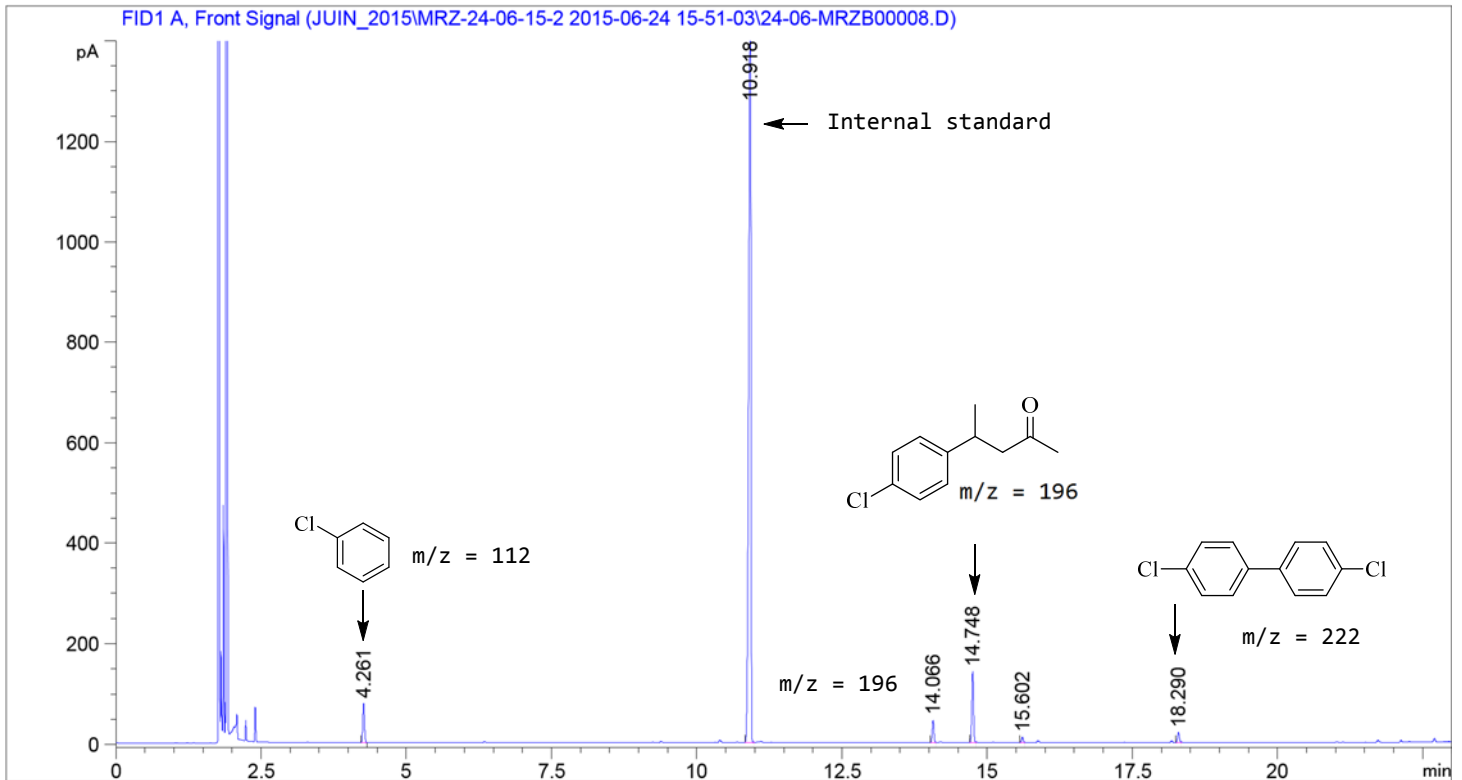

Area Percent Report

Signal 1: FID1 A, Front Signal

| Peak # | RetTime [min] | Type | Width [min] | Area [pA*s] | Height [pA] | Area %   |
|--------|---------------|------|-------------|-------------|-------------|----------|
| 1      | 4.261         | BB   | 0.0324      | 154.83516   | 77.14390    | 3.16783  |
| 2      | 10.918        | BB   | 0.0395      | 4084.89526  | 1616.71582  | 83.57448 |
| 3      | 14.066        | BB   | 0.0313      | 89.09248    | 44.52494    | 1.82278  |
| 4      | 14.748        | BB   | 0.0318      | 286.72934   | 140.26146   | 5.86631  |
| 5      | 15.602        | BB   | 0.0322      | 21.72890    | 10.48517    | 0.44456  |
| 6      | 18.290        | BB   | 0.0356      | 44.95020    | 19.72421    | 0.91965  |

Totals : 4682.2311

\*\*\* End of Report \*\*\*

```

=====
Acq. Operator   : SYSTEM                      Seq. Line :    4
Acq. Instrument : GC 7820 N2                 Location  : Vial 104
Injection Date  : 6/24/2015 1:51:10 PM      Inj       :    1
                                           Inj Volume: 0.5 µl

Acq. Method     : C:\CHEM32\1\DATA\JUIN_2015\MRZ24-06-2015-1 2015-06-24 11-13-30\CETONE-N2
MRZ-3.M
Last changed    : 6/24/2015 11:13:30 AM by SYSTEM
Analysis Method : C:\CHEM32\1\DATA\JUIN_2015\MRZ24-06-2015-1 2015-06-24 11-13-30\CETONE-N2-
MRZ-3.M (Sequence Method)
Last changed    : 7/21/2016 4:17:20 PM by SYSTEM
                 (modified after loading)
Additional Info  : Peak(s) manually integrated
  
```

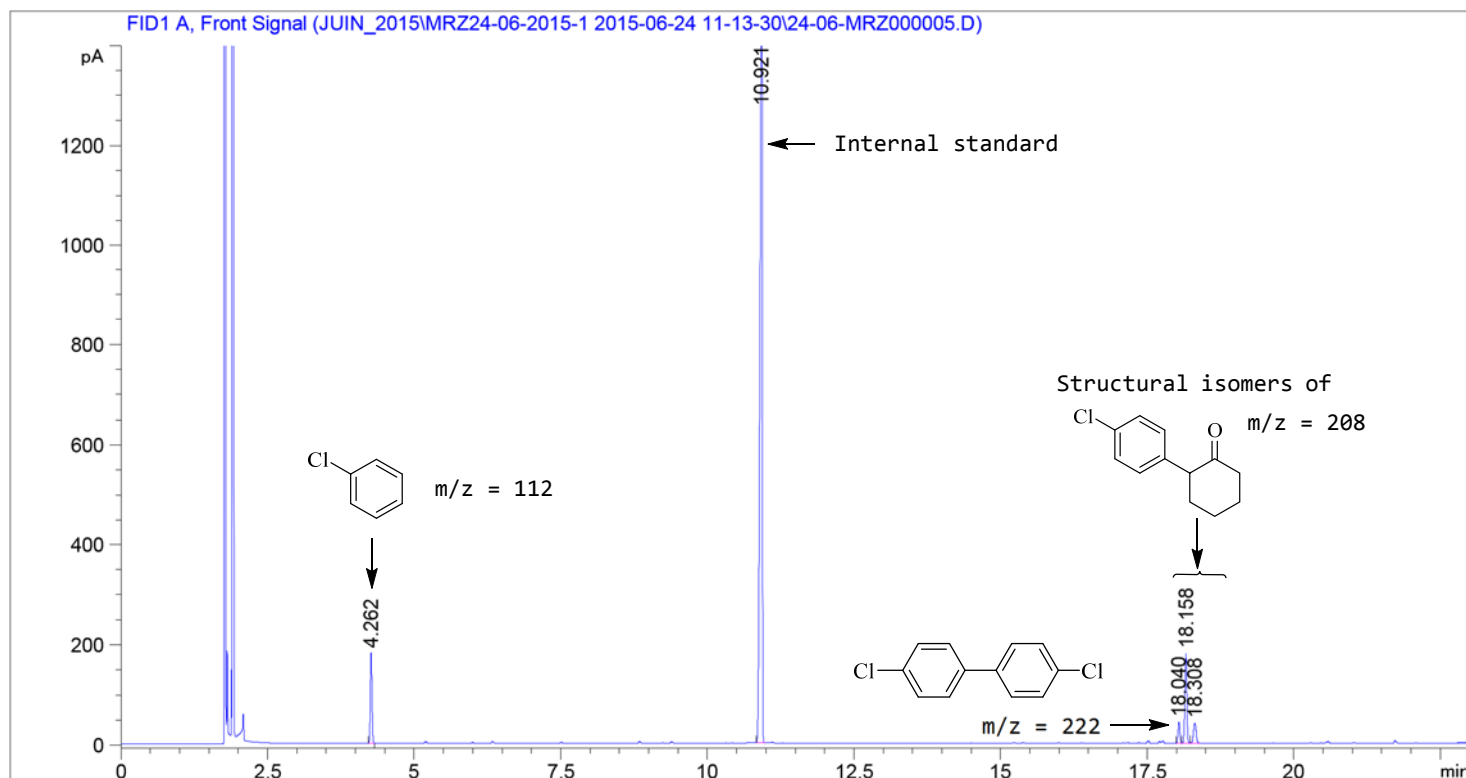

Area Percent Report

Signal 1: FID1 A, Front Signal

| Peak # | RetTime [min] | Type | Width [min] | Area [pA*s] | Height [pA] | Area %   |
|--------|---------------|------|-------------|-------------|-------------|----------|
| 1      | 4.262         | BB   | 0.0312      | 357.86322   | 179.71759   | 6.72182  |
| 2      | 10.921        | BB   | 0.0363      | 4238.97656  | 1688.62866  | 79.62153 |
| 3      | 18.040        | BV   | 0.0343      | 92.53336    | 42.66665    | 1.73807  |
| 4      | 18.158        | VB   | 0.0367      | 410.15247   | 178.96503   | 7.70397  |
| 5      | 18.308        | BB   | 0.0531      | 129.16893   | 39.59488    | 2.42621  |

Totals : 5228.6943

\*\*\* End of Report \*\*\*
